# Supplementary material for: Longitudinal assessment of metal concentrations and copper isotope ratios in the G93A SOD1 mouse model of amyotrophic lateral sclerosis
Source: Royal Society of Chemistry journal article supplement (doi:10.1039/c6mt00270f), 2016-12-20
Supplement: c6mt00270f1.pdf [file c6mt00270f1.pdf]

Supplementary information:

Results of the linear model with the following parameters:

Dependent variables: Cu, Zn, Fe, CuIso (Cu isotope ratios)

Independent variables: time (30, 60, 90, 120) and state (SOD1 and WT)

Time was treated as a continuous variable.

*stateWT* is the indicator variable for difference between states, with *stateSOD1* being the reference.

Results:

## Cu

### Cu Brain

| Coefficients: |          |            |         |          |     |
|---------------|----------|------------|---------|----------|-----|
|               | Estimate | Std. Error | t value | Pr(> t ) |     |
| (Intercept)   | 16.88036 | 2.62173    | 6.439   | 6.96e-08 | *** |
| stateWT       | -0.10929 | 2.00551    | -0.054  | 0.95678  |     |
| time          | 0.08835  | 0.02940    | 3.005   | 0.00434  | **  |

### Cu Spinal cord

| Coefficients: |          |            |         |          |     |
|---------------|----------|------------|---------|----------|-----|
|               | Estimate | Std. Error | t value | Pr(> t ) |     |
| (Intercept)   | 12.82288 | 2.35142    | 5.453   | 2.01e-06 | *** |
| stateWT       | -1.89467 | 1.79873    | -1.053  | 0.298    |     |
| time          | 0.04401  | 0.02637    | 1.669   | 0.102    |     |

### Cu Muscle

| Coefficients: |           |            |         |          |     |
|---------------|-----------|------------|---------|----------|-----|
|               | Estimate  | Std. Error | t value | Pr(> t ) |     |
| (Intercept)   | 12.75008  | 2.15083    | 5.928   | 4.31e-07 | *** |
| stateWT       | -10.00600 | 1.64097    | -6.098  | 2.43e-07 | *** |
| time          | 0.03469   | 0.02425    | 1.430   | 0.16     |     |

### Cu blood

| Coefficients: |           |            |         |          |     |
|---------------|-----------|------------|---------|----------|-----|
|               | Estimate  | Std. Error | t value | Pr(> t ) |     |
| (Intercept)   | 4.202613  | 0.512487   | 8.200   | 3.62e-11 | *** |
| stateWT       | -0.674357 | 0.375417   | -1.796  | 0.0778   | .   |
| time          | -0.003440 | 0.005556   | -0.619  | 0.5383   |     |

## Zn

### Zn Brain

| Coefficients: |          |            |         |          |     |
|---------------|----------|------------|---------|----------|-----|
|               | Estimate | Std. Error | t value | Pr(> t ) |     |
| (Intercept)   | 98.20885 | 11.56640   | 8.491   | 6.73e-11 | *** |
| stateWT       | -7.97077 | 8.84776    | -0.901  | 0.372    |     |
| time          | 0.02585  | 0.12972    | 0.199   | 0.843    |     |

### Zn Spinal cord

| Coefficients: |          |            |         |          |     |
|---------------|----------|------------|---------|----------|-----|
|               | Estimate | Std. Error | t value | Pr(> t ) |     |
| (Intercept)   | 60.0657  | 10.9858    | 5.468   | 2.03e-06 | *** |
| stateWT       | -13.4311 | 8.3714     | -1.604  | 0.1158   |     |
| time          | 0.2311   | 0.1240     | 1.864   | 0.0691   | .   |

### Zn Muscle

| Coefficients: |          |            |         |          |     |
|---------------|----------|------------|---------|----------|-----|
|               | Estimate | Std. Error | t value | Pr(> t ) |     |
| (Intercept)   | 72.8489  | 10.7452    | 6.780   | 2.68e-08 | *** |
| stateWT       | -39.3087 | 8.2716     | -4.752  | 2.27e-05 | *** |
| time          | 0.2055   | 0.1212     | 1.695   | 0.0973   | .   |

### Zn blood

| Coefficients: |          |            |         |          |     |
|---------------|----------|------------|---------|----------|-----|
|               | Estimate | Std. Error | t value | Pr(> t ) |     |
| (Intercept)   | 26.34043 | 3.48919    | 7.549   | 3.5e-10  | *** |
| stateWT       | -2.50953 | 2.62022    | -0.958  | 0.342    |     |
| time          | 0.06186  | 0.03827    | 1.617   | 0.111    |     |

## Fe Fe Brain

| Coefficients: |           |            |         |          |     |
|---------------|-----------|------------|---------|----------|-----|
|               | Estimate  | Std. Error | t value | Pr(> t ) |     |
| (Intercept)   | 107.82885 | 21.05521   | 5.121   | 1.52e-05 | *** |
| stateWT       | 5.84396   | 13.38300   | 0.437   | 0.665    |     |
| time          | 0.01305   | 0.23155    | 0.056   | 0.955    |     |

## Fe Spinal cord

| Coefficients: |          |            |         |          |     |
|---------------|----------|------------|---------|----------|-----|
|               | Estimate | Std. Error | t value | Pr(> t ) |     |
| (Intercept)   | 79.4316  | 15.0040    | 5.294   | 3.63e-06 | *** |
| stateWT       | -1.9171  | 11.4334    | -0.168  | 0.868    |     |
| time          | 0.1296   | 0.1693     | 0.766   | 0.448    |     |

## Fe Muscle

| Coefficients: |          |            |         |          |     |
|---------------|----------|------------|---------|----------|-----|
|               | Estimate | Std. Error | t value | Pr(> t ) |     |
| (Intercept)   | 62.3861  | 12.2794    | 5.081   | 7.77e-06 | *** |
| stateWT       | -35.3730 | 9.4527     | -3.742  | 0.000536 | *** |
| time          | 0.4231   | 0.1385     | 3.054   | 0.003871 | **  |

## Fe blood

| Coefficients: |          |            |         |          |     |
|---------------|----------|------------|---------|----------|-----|
|               | Estimate | Std. Error | t value | Pr(> t ) |     |
| (Intercept)   | 1478.196 | 360.696    | 4.098   | 0.000129 | *** |
| stateWT       | 152.990  | 269.184    | 0.568   | 0.571956 |     |
| time          | 7.907    | 3.954      | 2.000   | 0.050130 | .   |

## CuIso CuIso Brain

| Coefficients: |           |            |         |          |     |
|---------------|-----------|------------|---------|----------|-----|
|               | Estimate  | Std. Error | t value | Pr(> t ) |     |
| (Intercept)   | 1.939807  | 0.198597   | 9.768   | 8.55e-13 | *** |
| stateWT       | -0.078462 | 0.150649   | -0.521  | 0.6047   |     |
| time          | -0.005942 | 0.002227   | -2.669  | 0.0105   | *   |

## CuIso Spinal cord

| Coefficients: |          |            |         |          |     |
|---------------|----------|------------|---------|----------|-----|
|               | Estimate | Std. Error | t value | Pr(> t ) |     |
| (Intercept)   | 1.81947  | 0.18462    | 9.855   | 6.46e-13 | *** |
| stateWT       | 0.01631  | 0.13995    | 0.117   | 0.908    |     |
| time          | -0.00291 | 0.00207    | -1.406  | 0.167    | **  |

## CuIso Muscle

| Coefficients: |           |            |         |          |     |
|---------------|-----------|------------|---------|----------|-----|
|               | Estimate  | Std. Error | t value | Pr(> t ) |     |
| (Intercept)   | 2.327292  | 0.303983   | 7.656   | 1.10e-09 | *** |
| stateWT       | 0.287917  | 0.229790   | 1.253   | 0.217    |     |
| time          | -0.016758 | 0.003426   | -4.892  | 1.32e-05 | *** |

## CuIso blood

| Coefficients: |            |            |         |          |     |
|---------------|------------|------------|---------|----------|-----|
|               | Estimate   | Std. Error | t value | Pr(> t ) |     |
| (Intercept)   | 0.8819047  | 0.2003504  | 4.402   | 4.4e-05  | *** |
| stateWT       | -0.0017195 | 0.1488245  | -0.012  | 0.991    |     |
| time          | 0.0008823  | 0.0022175  | 0.398   | 0.692    |     |
